# Supplementary material for: The role of brown adipose tissue in branched-chain amino acid clearance in people
Source: PubMed Central journal article supplement (PMC11340589; doi:10.1016/j.isci.2024.110559), 2024-07-20
Supplement: mmc1.pdf [file mmc1.pdf]

## **Supplemental information**

### **The role of brown adipose tissue**

#### **in branched-chain amino acid clearance in people**

**Yasser G. Abdelhafez, Guobao Wang, Siqu Li, Vanessa Pellegrinelli, Abhijit J. Chaudhari, Anthony Ramirez, Fatma Sen, Antonio Vidal-Puig, Labros S. Sidossis, Samuel Klein, Ramsey D. Badawi, and Maria Chondronikola**

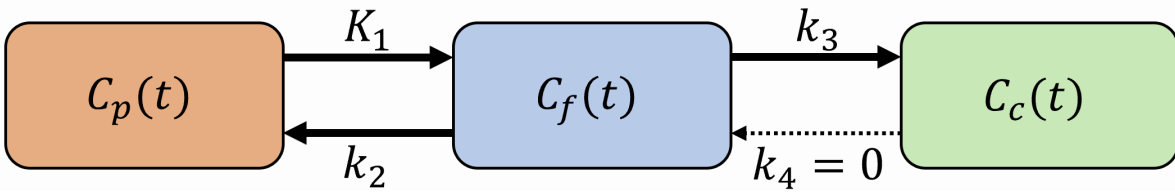

**Figure S1. Illustration of the irreversible two-tissue compartmental model used for analyzing dynamic  $^{18}\text{F}$ -fluciclovine positron emission tomography data.**  $C_p$ : tracer concentration in plasma;  $C_f$ : free-state (i.e., interstitial space) compartment;  $C_c$ : intracellular space compartment.  $K_1$  and  $k_{2-4}$ : flux rates between the different compartments. The parameter  $K_i$  (net uptake rate) was calculated as follows  $K_i = \frac{K_1 k_3}{k_2 + k_3}$  in the unit of  $\text{mL}/\text{min}/\text{cm}^3$  and reflects the clearance of  $^{18}\text{F}$ -fluciclovine from blood to tissue. Related to Figure 3.

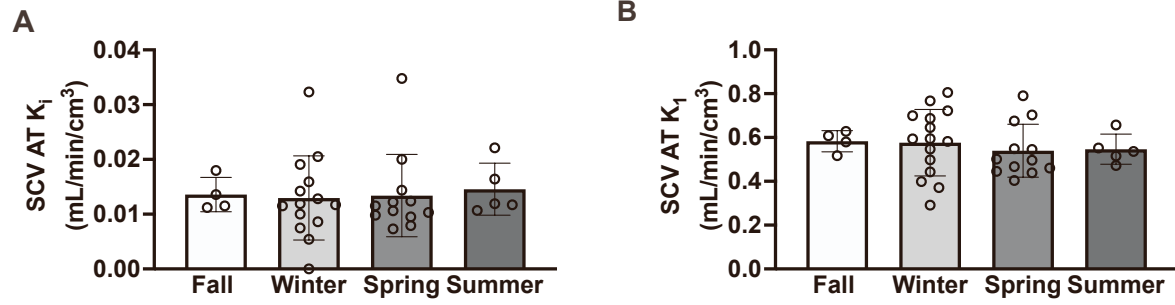

**Figure S2. Seasonal variability and  $^{18}\text{F}$ -fluciclovine uptake in supraclavicular adipose tissue (n = 35-36).** Data presented at mean and SD. AT: adipose tissue, HU: Hounsfield Units,  $K_1$ : net uptake rate reflecting clearance of  $^{18}\text{F}$ -fluciclovine from blood to tissue, SCV: supraclavicular,  $\text{SUV}_{\text{mean}}$ : mean standardized uptake value. Related to Figure 3.

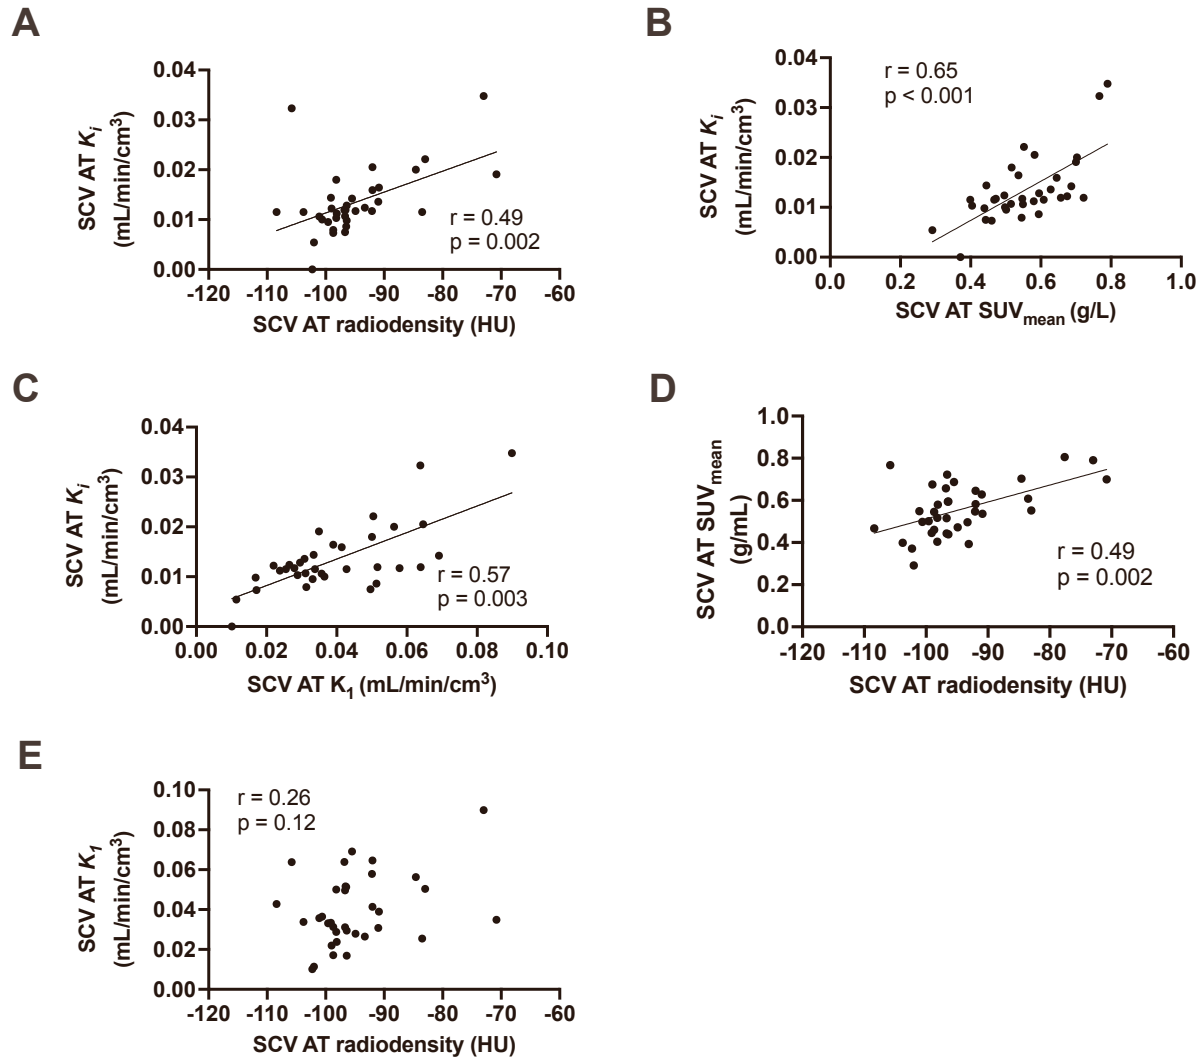

**Figure S3. Inter-relationships among supraclavicular adipose tissue radiodensity and <sup>18</sup>F-fluciclovine kinetics (n = 35-36).** Spearman's rho was used to evaluate the correlation between the different variables of interest. AT: adipose tissue, HU: Hounsfield Units,  $K_i$ : <sup>18</sup>F-fluciclovine tracer delivery rate, partially reflecting tissue perfusion,  $K_1$ : net uptake rate reflecting clearance of <sup>18</sup>F-fluciclovine from blood to tissue, SCV: supraclavicular. Related to Figure 3.

| <b>Parameters</b>                | <b>All<br/>n = 23</b> | <b>LBAT<br/>n = 7</b> | <b>HBAT<br/>n = 16</b> | <b>Participants<br/>with paired<br/>biopsies<br/>n = 12</b> |
|----------------------------------|-----------------------|-----------------------|------------------------|-------------------------------------------------------------|
| <b>Age (years)</b>               | 41 ± 12               | 47 ± 14               | 38 ± 11                | 38 ± 12                                                     |
| <b>Sex (females/males)</b>       | 17/6                  | 4/3                   | 13/3                   | 10/2                                                        |
| <b>Race (White/ Black/Asian)</b> | 20/2/1                | 5/1/1                 | 15/1/0                 | 12/0/0                                                      |
| <b>Height (cm)</b>               | 169 ± 8               | 171 ± 5               | 169 ± 9                | 166 ± 7                                                     |
| <b>Weight (kg)</b>               | 90 ± 13               | 90 ± 13               | 90 ± 14                | 86.8 ± 11.3                                                 |
| <b>BMI (kg/m<sup>2</sup>)</b>    | 31 ± 3                | 31 ± 3                | 32 ± 3                 | 32 ± 2                                                      |
| <b>Body fat (%)</b>              | 42 ± 6                | 41 ± 3                | 43 ± 7                 | 44 ± 3                                                      |

**Table S1. Demographic and anthropometric characteristics of healthy participants that provided adipose tissue biopsies.** Data are means ± SD. HBAT: group of participants with brown adipose tissue volume equal to or more than 20 ml; LBAT: group of participants with brown adipose tissue volume less than 20 ml. Related to Table 1 and Figure 5.

| Gene            | Accession No.  | Forward (F) and Reverse (R) Primer                    |
|-----------------|----------------|-------------------------------------------------------|
| <i>BCAT1</i>    | NM_005504.7    | F: CCGACGGAACAATGAAGGATTG<br>R: GTCCCCACCACCTCTTTTGA  |
| <i>BCAT2</i>    | NM_001190.4    | F: ACAGTTACGCGCCGCA<br>R: CAGGTCTGCAGCCTTGAAAC        |
| <i>BCKDHB</i>   | NM_183050.4    | F: CCGGGAGTACGGGCAAAC<br>R: TGACCGCAATTCCGATTCCA      |
| <i>RPLP0</i>    | NM_001002      | F: GTGATGTGCAGCTGATCAAGACT<br>R: GATGACCAGCCCAAAGGAGA |
| <i>SLC25A44</i> | NM_001286184.2 | F: GCTGGGAACGACGGATAGAC<br>R: GGTGCCTGAAGACCTTCTCA    |
| <i>UCP1</i>     | NM_021833      | F: AGGTCCAAGGTGAATGCC<br>R: TTACCACAGCGGTGATTGTTC     |

**Table S2. Sequence of primers used for reverse transcription polymerase chain reaction.** Related to Figure 5.
